## Impact of early (<24h) versus delayed (>24h) intervention in patients with non ST segment elevation myocardial infarction (an observational study of 20882 patients)

V. Panoulas<sup>1</sup>, K. Rathod<sup>2</sup>, A. Kain<sup>2</sup>, S. Firooz<sup>3</sup>, J. Nevett<sup>4</sup>, S. Kalra<sup>5</sup>, I. Malik<sup>6</sup>, A. Mathur<sup>2</sup>, S. Redwood<sup>7</sup>, P.A. MacCarthy<sup>8</sup>, A. Wragg<sup>2</sup>, D. Jones<sup>2</sup>, M.C. Dalby<sup>9</sup>

<sup>1</sup>Harefield Hospital, Royal Brompton and Harefield NHS Foundation Trust, London, United Kingdom; <sup>2</sup>Barts Health NHS Trust, Cardiology, London, United Kingdom; <sup>3</sup>St George's Healthcare NHS Trust, Cardiology, London, United Kingdom; <sup>4</sup>London Ambulance Service, London, United Kingdom; <sup>5</sup>Royal Free Hospital, Cardiology, London, United Kingdom; <sup>6</sup>Hammersmith Hospital, London, United Kingdom; <sup>7</sup>St Thomas' Hospital, Cardiology, London, United Kingdom; <sup>8</sup>King's College Hospital, Cardiology, London, United Kingdom; <sup>9</sup>Harefield Hospital, Interventional cardiology, London, United Kingdom

On behalf of London Heart Attack Group

**Funding Acknowledgement:** Type of funding source: None

**Background:** In patients presenting with non ST-segment elevation acute coronary syndromes (NSTEMI-ACS) an invasive approach has been shown to be superior to conservative management.

**Purpose:** We aimed to investigate the optimal timing of invasive coronary angiography and subsequent intervention.

**Methods:** We examined the impact of early ( $\leq 24$ h) versus delayed ( $> 24$ h) intervention in a large observational cohort of 20882 consecutive patients with acute NSTEMI myocardial infarction (NSTEMI) treated with PCI between 2005 and 2015 at 9 tertiary cardiac centers in London (UK) using Cox-regression analysis and propensity matching.

**Results:** Mean age was  $64.5 \pm 12.7$  years and 26.1% were females. A quarter (27.6%), were treated within 24h. Patients treated within 24h were slightly younger ( $62.8 \pm 12.8$  vs.  $65.2 \pm 12.6$ ,  $p < 0.001$ ), most commonly male

(76% vs. 72.9%,  $p < 0.001$ ) and were more frequently ventilated (2.3% vs. 1.4%,  $p < 0.001$ ) and in cardiogenic shock (3.6% vs. 1.4%,  $p < 0.001$ ) with dynamic changes on their ECG (84.5% vs. 76.1%  $p < 0.001$ ). At a median follow up of 4.2 years (interquartile range 1.8 to 7) 17.7% of patients had died. Estimated 5-year survival in patients treated within 24h was 84.6% vs. 81% for those treated  $> 24$ h following their presentation ( $p < 0.001$ ). This survival benefit remained following adjustment for confounders; HR (delayed vs. early management) 1.11 (95% CI 1.003 to 1.23,  $p = 0.046$ ). In the propensity matched cohort of 4356 patients in each group, there remained a trend for higher survival in the early intervention group ( $p = 0.061$ ).

**Conclusions:** Notwithstanding the limitations of the retrospective design, this real-world cohort of NSTEMI patients suggests that an early intervention ( $\leq 24$ h) may improve mid term survival.

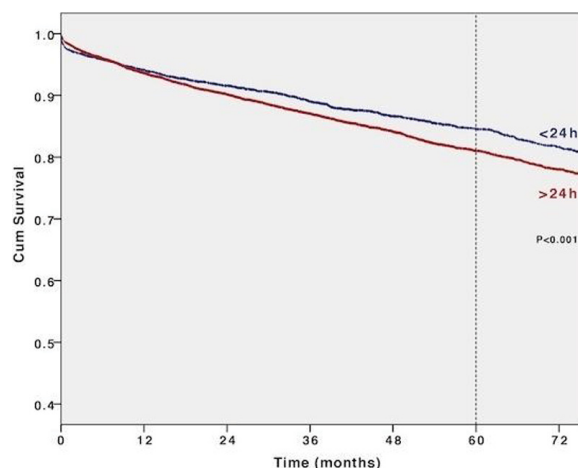

| At risk     | Time 0 | 1 year | 5 years |
|-------------|--------|--------|---------|
| $\leq 24$ h | 5857   | 3819   | 1751    |
| $> 24$ h    | 15121  | 7888   | 3456    |

Figure 1
